# Supplementary material for: Unconventional Perfusion Flaps in the Experimental Setting: A Systematic Review and Meta-Analysis
Source: PubMed Central journal article supplement — Plast Reconstr Surg. 2019 Apr 29;143(5):1003–16. doi: 10.1097/PRS.0000000000005560 (PMC6493691; doi:10.1097/prs.0000000000005560), 2019-04-29
Supplement: prs-143-1003e-s001.pdf [file prs-143-1003e-s001.pdf]

**Pubmed Search on 1 February 2017 using the following terms:**

“arterialized venous flap”; “arterialised venous flap”; “unconventional flap”;  
“unconventional perfusion flap”; “non-conventional flap”; “non-conventional perfusion  
flap”; “venous flap” and “venous perfusion flap”

Selected articles limited to English, Spanish, Portuguese, French and/or Italian languages

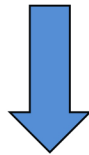

77 citations were selected for further review based on article abstracts

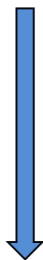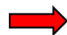

25 were excluded

52 citations were selected for detailed review after acquiring full text

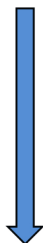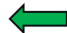

16 additional citations were included  
from the previously selected citations;  
full texts were acquired

**68 studies** were included in the systematic review

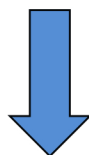

**1073 flaps** were included in the meta-analysis
