# Supplementary material for: Unconventional Perfusion Flaps in the Experimental Setting: A Systematic Review and Meta-Analysis
Source: PubMed Central journal article supplement — Plast Reconstr Surg. 2019 Apr 29;143(5):1003–16. doi: 10.1097/PRS.0000000000005560 (PMC6493691; doi:10.1097/prs.0000000000005560), 2019-04-29
Supplement: prs-143-1003e-s002.pdf [file prs-143-1003e-s002.pdf]

| First Author       | Year | Country     | Optimized experimental animal model | Species | Strain | Gender | n  | Flap donor site | Flap vascular pattern | Wound bed blood supply | Delayed flap | Flap composition | Flap innervation preserved | Flap survival rate (%) | Categorical flap survival (%) |      |      |      | Necrotic flap area (%) |      |      |     |
|--------------------|------|-------------|-------------------------------------|---------|--------|--------|----|-----------------|-----------------------|------------------------|--------------|------------------|----------------------------|------------------------|-------------------------------|------|------|------|------------------------|------|------|-----|
|                    |      |             |                                     |         |        |        |    |                 |                       |                        |              |                  |                            |                        | CS                            | NCS  | SN   | CN   | Average                | Min. | Max. |     |
| Nakayama (49)      | 1981 | Japan       | 1                                   | Rat     | n/a    | M      | 5  | T/A             | 6                     | WV                     | Yes          | FC               | n/a                        | 100                    | 100                           | 0    | 0    | 0    | 0                      | 0    | 0    |     |
|                    |      |             | 2                                   | Rat     | n/a    | M      | 10 | T/A             | 6                     | WV                     | No           | FC               | n/a                        | 100                    | n/a                           | n/a  | 0    | 0    | 0                      | 2    | 0    | 2.7 |
|                    |      |             | 3                                   | Rat     | n/a    | M      | 20 | T/A             | 4                     | WV                     | No           | FC               | n/a                        | 100                    | n/a                           | n/a  | n/a  | 0    | 7                      | 0    | 0    | 21  |
| Voukides (50)      | 1982 | UK          | 4                                   | Rat     | SD     | M+F    | 10 | A/G             | 3                     | IB                     | Yes          | FC               | No                         | 100                    | n/a                           | n/a  | n/a  | 0    | n/a                    | n/a  | n/a  |     |
| Mundy (51)         | 1984 | USA         | 5                                   | Rabbit  | n/a    | n/a    | 5  | E               | 1                     | B/C                    | Yes          | FC               | No                         | n/a                    | n/a                           | n/a  | n/a  | 0    | 13                     | n/a  | n/a  |     |
|                    |      |             | 6                                   | Rabbit  | n/a    | n/a    | 5  | E               | 1                     | B/C                    | No           | FC               | No                         | n/a                    | n/a                           | n/a  | n/a  | 0    | 24                     | n/a  | n/a  |     |
| Ji (52)            | 1984 | China       | 7                                   | Rabbit  | n/a    | M+F    | 33 | E               | 1                     | B/C                    | No           | FC               | No                         | 100                    | 50.9                          | 0    | 5.1  | 0    | n/a                    | 0    | n/a  |     |
| Beehary (53)       | 1984 | France      | 8                                   | Rat     | n/a    | n/a    | 5  | A/G             | 3                     | WV                     | No           | FC               | n/a                        | 100                    | 100                           | 0    | 0    | 0    | 0                      | 0    | 0    |     |
| Baek (54)          | 1985 | South Korea | 9                                   | Dog     | M      | n/a    | 36 | H               | 10                    | WV                     | No           | FC               | No                         | 100                    | 100                           | 0    | 0    | 0    | 0                      | 0    | 0    |     |
|                    |      |             | 10                                  | Dog     | M      | n/a    | 10 | H               | 10                    | IB                     | No           | FC               | No                         | 100                    | 100                           | 0    | 0    | 0    | 0                      | 0    | 0    |     |
|                    |      |             | 11                                  | Dog     | M      | n/a    | 2  | H               | 7                     | WV                     | No           | FC               | No                         | 100                    | 100                           | 0    | 0    | 0    | 0                      | 0    | 0    |     |
| Nichter (12)       | 1985 | USA         | 12                                  | Rabbit  | NZ     | M      | 10 | E               | 2                     | SE                     | No           | B/C              | No                         | 100                    | n/a                           | n/a  | n/a  | 0    | n/a                    | n/a  | n/a  |     |
| Thatté (55)        | 1987 | India       | 13                                  | Dog     | M      | M+F    | 14 | H               | 10                    | WV                     | No           | FC               | No                         | 91.7                   | n/a                           | n/a  | n/a  | 0    | 8.33                   | n/a  | n/a  | 100 |
| Germann (20)       | 1987 | Germany     | 14                                  | Pig     | Y      | M      | 12 | H               | 5                     | WV                     | No           | FC               | Yes                        | 0                      | 0                             | 0    | 0    | 100  | 100                    | 100  | 100  |     |
| Amarante (56)      | 1988 | Portugal    | 15                                  | Dog     | n/a    | n/a    | 5  | H               | 10                    | WV                     | No           | FC               | Yes                        | 100                    | 100                           | 0    | 0    | 0    | 0                      | 0    | 0    |     |
|                    |      |             | 16                                  | Dog     | n/a    | n/a    | 5  | H               | 9                     | WV                     | No           | FC               | Yes                        | 100                    | 100                           | 0    | 0    | 0    | 0                      | 0    | 0    |     |
|                    |      |             | 17                                  | Dog     | n/a    | n/a    | 4  | H               | 7                     | WV                     | No           | FC               | Yes                        | 100                    | 100                           | 0    | 0    | 0    | 0                      | 0    | 0    |     |
| Fukui (57)         | 1988 | Japan       | 18                                  | Rabbit  | n/a    | n/a    | 20 | E               | 10                    | B/C                    | No           | FC               | No                         | 100                    | 80                            | 10   | 0    | 0    | 0                      | n/a  | 0    | n/a |
| Sasa (58)          | 1988 | USA         | 19                                  | Dog     | M      | M+F    | 8  | F               | 10                    | WV                     | No           | FC               | No                         | 75                     | 0                             | 75   | 0    | 25   | n/a                    | n/a  | 100  |     |
|                    |      |             | 20                                  | Rabbit  | n/a    | n/a    | 20 | E               | 10                    | B/C                    | No           | FC               | No                         | 100                    | 90                            | 0    | 10   | 0    | n/a                    | 0    | n/a  |     |
| Inada (59)         | 1989 | Japan       | 21                                  | Rabbit  | n/a    | n/a    | 21 | E               | 1                     | B/C                    | No           | FC               | No                         | 100                    | 85.7                          | 0    | 14.3 | 0    | n/a                    | 0    | n/a  |     |
|                    |      |             | 22                                  | Rat     | W      | M      | 10 | A/G             | 9                     | WV                     | No           | FC               | n/a                        | 90                     | 80                            | n/a  | n/a  | 10   | n/a                    | 0    | 100  |     |
| Noreldin (61)      | 1992 | USA         | 23                                  | Rat     | W      | M      | 10 | A/G             | 9                     | IB                     | No           | FC               | n/a                        | 100                    | 90                            | n/a  | n/a  | 0    | n/a                    | 0    | n/a  |     |
|                    |      |             | 24                                  | Rat     | W      | M      | 20 | A/G             | 10                    | WV                     | No           | FC               | n/a                        | 90                     | 75                            | n/a  | n/a  | 10   | n/a                    | 0    | 100  |     |
| Takato (62)        | 1992 | Canada      | 25                                  | Rabbit  | NZ     | F      | 18 | A/G             | 3                     | WV                     | No           | FC               | No                         | 100                    | 66.7                          | 33.3 | 0    | 0    | 2.4                    | 0    | 10   |     |
| Chow (63)          | 1992 | China       | 26                                  | Rat     | SD     | n/a    | 20 | A/G             | 3                     | WV                     | No           | FC               | n/a                        | n/a                    | n/a                           | n/a  | n/a  | 0    | 39.6                   | n/a  | n/a  |     |
| Angel (64)         | 1992 | USA         | 27                                  | Dog     | n/a    | n/a    | 6  | H               | 10                    | WV                     | No           | FC               | No                         | 100                    | n/a                           | n/a  | n/a  | 0    | n/a                    | n/a  | n/a  |     |
| Inada (65)         | 1992 | Japan       | 28                                  | Rabbit  | n/a    | n/a    | 10 | E               | 10                    | B/C                    | No           | FC               | Yes                        | 100                    | 0                             | 0    | 100  | 0    | 56                     | 30   | 78   |     |
|                    |      |             | 29                                  | Rabbit  | J      | n/a    | 18 | E               | 1                     | B/C                    | No           | FC               | n/a                        | 100                    | n/a                           | n/a  | 0    | 0    | 0                      | n/a  | n/a  | n/a |
| Inada (66)         | 1993 | Japan       | 30                                  | Rabbit  | J      | n/a    | 17 | E               | 2                     | B/C                    | No           | FC               | n/a                        | 100                    | n/a                           | n/a  | 0    | 0    | n/a                    | n/a  | n/a  |     |
|                    |      |             | 31                                  | Rabbit  | NZ     | M+F    | 6  | T/A             | 10                    | WV                     | No           | FC               | Yes                        | 100                    | 83.3                          | n/a  | n/a  | 0    | n/a                    | 0    | n/a  |     |
| Gençosmanoğlu (68) | 1993 | Turkey      | 32                                  | Rabbit  | n/a    | n/a    | 10 | T/A             | 10                    | WV                     | No           | FC               | Yes                        | 100                    | 80                            | 20   | 0    | 0    | n/a                    | 0    | n/a  |     |
| Ueda (69)          | 1993 | Japan       | 33                                  | Rabbit  | n/a    | n/a    | 15 | E               | 10                    | SE                     | Yes          | B/C              | Yes                        | 100                    | n/a                           | n/a  | n/a  | 0    | n/a                    | n/a  | n/a  |     |
| Fukui (17)         | 1993 | Japan       | 34                                  | Rat     | F      | M      | 28 | D               | 10                    | WV                     | No           | MFC              | Yes                        | 85.7                   | 85.7                          | 0    | 0    | 14.3 | 14.3                   | 0    | 100  |     |
| Takato (70)        | 1993 | Japan       | 35                                  | Rabbit  | NZ     | M      | 5  | A/G             | 10                    | IB                     | No           | FC               | n/a                        | 100                    | 0                             | 0    | 100  | 0    | 74.8                   | 67.6 | 79.7 |     |
| Thatté (71)        | 1993 | India       | 36                                  | Rat     | W      | M      | 5  | A/G             | 10                    | WV                     | No           | FC               | n/a                        | 100                    | n/a                           | n/a  | n/a  | 0    | n/a                    | n/a  | n/a  |     |
| Lenoble (72)       | 1993 | France      | 37                                  | Rat     | W      | M+F    | 15 | A/G             | 10                    | WV                     | No           | FC               | Yes                        | 26.7                   | 0                             | 20   | 6.7  | 73.3 | 77                     | 10   | 100  |     |
| Smith (73)         | 1994 | USA         | 38                                  | Rabbit  | NZ     | n/a    | 10 | E               | 10                    | B/C                    | No           | FC               | n/a                        | 100                    | 70                            | n/a  | n/a  | 0    | 18.1                   | 0    | n/a  |     |
|                    |      |             | 39                                  | Dog     | M      | n/a    | 6  | F               | 10                    | WV                     | No           | FC               | n/a                        | 66.7                   | 33.3                          | 0    | 33.3 | 33.3 | 41.7                   | 0    | 100  |     |
|                    |      |             | 40                                  | Dog     | M      | n/a    | 6  | F               | 1                     | WV                     | No           | FC               | n/a                        | 66.7                   | 33.3                          | 16.7 | 16.7 | 33.3 | 41.7                   | 0    | 100  |     |
| Suzuki(75)         | 1994 | Japan       | 42                                  | Rabbit  | J      | M      | 6  | E               | 1                     | B/C                    | No           | FC               | Yes                        | 100                    | n/a                           | n/a  | n/a  | 0    | n/a                    | n/a  | n/a  |     |
| Wolff (76)         | 1995 | Germany     | 43                                  | Rat     | W      | M      | 7  | A/G             | 4                     | WV                     | No           | FC               | n/a                        | 100                    | 14.3                          | 57.1 | 28.6 | 0    | 7                      | 0    | 16   |     |
| Byun (77)          | 1995 | USA         | 44                                  | Rabbit  | NZ     | M      | 8  | E               | 3                     | SE                     | Yes          | B/C              | Yes                        | 100                    | 0                             | 100  | 0    | 0    | 5.9                    | n/a  | n/a  |     |
| Xiu (78)           | 1996 | China       | 45                                  | Rabbit  | n/a    | n/a    | 20 | T/A             | 10                    | WV                     | No           | FC               | n/a                        | n/a                    | n/a                           | n/a  | n/a  | 0    | 7.68                   | n/a  | n/a  |     |
| Pitetti (79)       | 1996 | USA         | 46                                  | Rabbit  | NZ     | n/a    | 16 | E               | 1                     | B/C                    | No           | FC               | No                         | 100                    | 100                           | 0    | 0    | 0    | 0                      | 0    | 1    |     |
| Adamo (80)         | 1996 | Italy       | 47                                  | Rat     | W      | n/a    | 10 | T/A             | 10                    | WV                     | No           | FC               | n/a                        | 100                    | n/a                           | n/a  | 40   | 0    | n/a                    | n/a  | n/a  |     |
|                    |      |             | 48                                  | Rat     | W      | n/a    | 10 | T/A             | 10                    | IB                     | No           | FC               | n/a                        | 100                    | n/a                           | n/a  | 30   | 0    | n/a                    | n/a  | 70   |     |
| Xiu (81)           | 1996 | China       | 49                                  | Rabbit  | n/a    | n/a    | 40 | T/A             | 10                    | WV                     | No           | FC               | No                         | n/a                    | n/a                           | n/a  | n/a  | 0    | 31.3                   | 0    | 100  |     |
| Miles (82)         | 1997 | Canada      | 50                                  | Rat     | SD     | M      | 4  | T/A             | 5                     | WV                     | No           | FC               | n/a                        | n/a                    | n/a                           | n/a  | n/a  | 43   | n/a                    | n/a  |      |     |
| Yilmaz (83)        | 1997 | Turkey      | 51                                  | Rabbit  | NZ     | n/a    | 12 | E               | 10                    | SE                     | No           | B/C              | No                         | 83.3                   | 41.7                          | n/a  | n/a  | 16.7 | 24.2                   | 0    | 100  |     |
| Fukui (84)         | 1998 | Japan       | 52                                  | Rabbit  | n/a    | n/a    | 22 | E               | 1                     | WV                     | Yes          | FC               | No                         | 100                    | 54.6                          | n/a  | n/a  | 0    | n/a                    | 0    | n/a  |     |
| Woo (85)           | 1998 | South Korea | 53                                  | Dog     | M      | M+F    | 12 | H               | 4                     | IB                     | No           | FC               | n/a                        | n/a                    | n/a                           | n/a  | n/a  | 3.8  | n/a                    | n/a  |      |     |
| Yuan (86)          | 1998 | China       | 54                                  | Rabbit  | NZ     | n/a    | 38 | E               | 10                    | SE                     | No           | B/C              | No                         | 100                    | n/a                           | n/a  | n/a  | 0    | n/a                    | n/a  | n/a  |     |
| Atabay (87)        | 1998 | Turkey      | 55                                  | Rabbit  | NZ     | n/a    | 10 | T/A             | 10                    | WV                     | No           | FC               | No                         | 30.0                   | 30                            | 0    | 0    | 70   | 30                     | 0    | 100  |     |
| Cho (88)           | 1998 | South Korea | 56                                  | Rabbit  | NZ     | M      | 7  | E               | 1                     | SE                     | Yes          | B/C              | Yes                        | 100                    | 0                             | 0    | 100  | 0    | 40.3                   | 22   | 56   |     |
| Mutaf (89)         | 1998 | Japan       | 57                                  | Rat     | L      | n/a    | 10 | T/A             | 10                    | IB                     | Yes          | FC               | n/a                        | n/a                    | n/a                           | n/a  | n/a  | 37.4 | n/a                    | n/a  |      |     |
| Yilmaz (90)        | 1999 | Turkey      | 58                                  | Rabbit  | NZ     | n/a    | 12 | E               | 1                     | IB                     | No           | B/C              | No                         | 83.3                   | 58.3                          | n/a  | n/a  | 16.7 | 22                     | 0    | 100  |     |
| Murata (91)        | 1999 | Japan       | 59                                  | Rabbit  | n/a    | n/a    | 10 | E               | 10                    | WV                     | No           | FC               | Yes                        | 100                    | 10                            | n/a  | n/a  | 0    | 17.5                   | 0    | 100  |     |
| Yücel (92)         | 2000 | Turkey      | 60                                  | Rat     | SD     | M      | 32 | A/G             | 10                    | WV                     | No           | FC               | No                         | 0                      | 0                             | 0    | 0    | 100  | 100                    | 100  | 100  |     |
| Tang (93)          | 2000 | Taiwan      | 61                                  | Rabbit  | NZ     | n/a    | 30 | T/A             | 10                    | WV                     | No           | MFC              | No                         | 100                    | n/a                           | n/a  | n/a  | 0    | n/a                    | 0    | n/a  |     |
| Wangcharoen (94)   | 2001 | Thailand    | 62                                  | Rat     | W      | M      | 9  | T/A             | 3                     | IB                     | Yes          | FC               | No                         | n/a                    | n/a                           | n/a  | n/a  | n/a  | 2.5                    | n/a  | n/a  |     |
| Saray (95)         | 2002 | Turkey      | 63                                  | Rabbit  | n/a    | n/a    | 10 | E               | 10                    | IB                     | No           | FC               | No                         | 100                    | n/a                           | n/a  | n/a  | 0    | 41.9                   | n/a  | n/a  |     |
| Chang (96)         | 2003 | China       | 64                                  | Rabbit  | NZ     | n/a    | 10 | H               | 8                     | IB                     | No           | FC               | Yes                        | 100                    | 50                            | 50   | 0    | 0    | 5.5                    | 0    | n/a  |     |
| Coruh (97)         | 2004 | Turkey      | 65                                  | Rabbit  | NZ     | M      | 10 | E               | 10                    | B/C                    | No           | FC               | No                         | 100                    | 0                             | 0    | 100  | 0    | 40                     | 26.0 | 77.6 |     |
|                    |      |             | 66                                  | Rabbit  | NZ     | M      | 10 | E               | 10                    | B/C                    | No           | FC               | No                         | 100                    | 0                             | 0    | 100  | 0    | 42                     | 19.7 | 55.4 |     |
| Lin (98)           | 2004 | Taiwan      | 67                                  | Rabbit  | NZ     | n/a    | 13 | E               | 10                    | SE                     | No           | B/C              | No                         | 100                    | n/a                           | n/a  | n/a  | 0    | 6.6                    | 0    | 55.6 |     |
| Baser (99)         | 2005 | Turkey      | 68                                  | Rat     | SD     | n/a    | 6  | D               | 10                    | WV                     | Yes          | FC               | n/a                        | 100                    | 16.7                          | 0    | 83.3 | 0    | 37.5                   | 0    | 46   |     |
| Zhang (100)        | 2006 | USA         | 69                                  | Rat     | SD     | M      | 10 | A/G             | 10                    | WV                     | No           | FC               | No                         | n/a                    | n/a                           | n/a  | n/a  | n/a  | 61                     | n/a  | n/a  |     |
| Özyazgan (101)     | 2007 | Turkey      | 70                                  | Rabbit  | NZ     | n/a    | 7  | E               | 10                    | B/C                    | No           | FC               | No                         | n/a                    | n/a                           | n/a  | n/a  | n/a  | 44                     | n/a  | n/a  |     |
| Özyazgan (102)     | 2007 | Turkey      | 71                                  | Rabbit  | NZ     | M      | 14 | E               | 10                    | B/C                    | No           | FC               | No                         | n/a                    | n/a                           | n/a  | n/a  | n/a  | 39                     | n/a  | n/a  |     |
| Pitetti (103)      | 2008 | Switzerland | 72                                  | Rabbit  | NZ     | n/a    | 15 | E               | 1                     | WV                     | No           | FC               | No                         | 100                    | n/a                           | n/a  | 0    | 0    | 0.6                    | 0    | n/a  |     |
|                    |      |             | 73                                  | Rabbit  |        |        |    |                 |                       |                        |              |                  |                            |                        |                               |      |      |      |                        |      |      |     |
