# Supplementary material for: Unconventional Perfusion Flaps in the Experimental Setting: A Systematic Review and Meta-Analysis
Source: PubMed Central journal article supplement — Plast Reconstr Surg. 2019 Apr 29;143(5):1003–16. doi: 10.1097/PRS.0000000000005560 (PMC6493691; doi:10.1097/prs.0000000000005560), 2019-04-29
Supplement: prs-143-1003e-s006.pdf [file prs-143-1003e-s006.pdf]

## Proportion of complete and nearly complete survival versus complete or partial necrosis; 95% CI

Optimized experimental model  
(Study name)

Event rate Lower limit Upper limit Z-Value p-Value

| Study name               | Event rate | Lower limit | Upper limit | Z-Value | p-Value  |
|--------------------------|------------|-------------|-------------|---------|----------|
| 1 (Nakayama, 1981)       | 0,917      | 0,378       | 0,995       | 1,623   | 0,104508 |
| 2 (Nakayama, 1981)       | 0,955      | 0,552       | 0,997       | 2,103   | 0,035439 |
| 7 (Ji, 1984)             | 0,909      | 0,753       | 0,970       | 3,803   | 0,000143 |
| 8 (Beehary, 1984)        | 0,917      | 0,378       | 0,995       | 1,623   | 0,104508 |
| 9 (Baek, 1985)           | 0,986      | 0,818       | 0,999       | 3,013   | 0,002585 |
| 10 (Baek, 1985)          | 0,955      | 0,552       | 0,997       | 2,103   | 0,035439 |
| 11 (Baek, 1985)          | 0,833      | 0,194       | 0,990       | 1,039   | 0,298857 |
| 14 (Germann, 1987)       | 0,038      | 0,002       | 0,403       | -2,232  | 0,025622 |
| 15 (Amarante, 1988)      | 0,917      | 0,378       | 0,995       | 1,623   | 0,104508 |
| 16 (Amarante, 1988)      | 0,917      | 0,378       | 0,995       | 1,623   | 0,104508 |
| 17 (Amarante, 1988)      | 0,900      | 0,326       | 0,994       | 1,474   | 0,140497 |
| 18 (Fukui, 1988)         | 0,976      | 0,713       | 0,999       | 2,594   | 0,009474 |
| 19 (Sasa, 1988)          | 0,750      | 0,377       | 0,937       | 1,346   | 0,178457 |
| 20 (Inada, 1989)         | 0,900      | 0,676       | 0,975       | 2,948   | 0,003200 |
| 21 (Inada, 1989)         | 0,857      | 0,639       | 0,953       | 2,873   | 0,004063 |
| 25 (Takato, 1992)        | 0,974      | 0,690       | 0,998       | 2,519   | 0,011753 |
| 28 (Inada, 1992)         | 0,045      | 0,003       | 0,448       | -2,103  | 0,035439 |
| 29 (Inada, 1993)         | 0,974      | 0,690       | 0,998       | 2,519   | 0,011753 |
| 30 (Inada, 1993)         | 0,972      | 0,678       | 0,998       | 2,479   | 0,013181 |
| 32 (Gençosmanoglu, 1993) | 0,955      | 0,552       | 0,997       | 2,103   | 0,035439 |
| 34 (Fukui, 1993)         | 0,857      | 0,676       | 0,945       | 3,318   | 0,000908 |
| 35 (Takato, 1993)        | 0,083      | 0,005       | 0,622       | -1,623  | 0,104508 |
| 37 (Lenoble, 1993)       | 0,200      | 0,066       | 0,470       | -2,148  | 0,031743 |
| 39 (Dvir, 1994)          | 0,333      | 0,084       | 0,732       | -0,800  | 0,423492 |
| 40 (Dvir, 1994)          | 0,500      | 0,168       | 0,832       | 0,000   | 1,000000 |
| 41 (Dvir, 1994)          | 0,500      | 0,168       | 0,832       | 0,000   | 1,000000 |
| 43 (Woff, 1995)          | 0,714      | 0,327       | 0,928       | 1,095   | 0,273439 |
| 44 (Byun, 1995)          | 0,944      | 0,495       | 0,997       | 1,947   | 0,051542 |
| 46 (Pittet, 1996)        | 0,971      | 0,664       | 0,998       | 2,436   | 0,014860 |
| 47 (Adamo, 1996)         | 0,600      | 0,297       | 0,842       | 0,628   | 0,529910 |
| 48 (Adamo, 1996)         | 0,700      | 0,376       | 0,900       | 1,228   | 0,219503 |
| 55 (Atabey, 1998)        | 0,300      | 0,100       | 0,624       | -1,228  | 0,219503 |
| 56 (Cho, 1998)           | 0,063      | 0,004       | 0,539       | -1,854  | 0,063728 |
| 60 (Yücel, 2000)         | 0,015      | 0,001       | 0,201       | -2,929  | 0,003397 |
| 64 (Chang, 2003)         | 0,955      | 0,552       | 0,997       | 2,103   | 0,035439 |
| 65 (Coruh, 2004)         | 0,045      | 0,003       | 0,448       | -2,103  | 0,035439 |
| 66 (Coruh, 2004)         | 0,045      | 0,003       | 0,448       | -2,103  | 0,035439 |
| 68 (Baser, 2005)         | 0,167      | 0,023       | 0,631       | -1,469  | 0,141776 |
| 72 (Pittet, 2008)        | 0,969      | 0,650       | 0,998       | 2,390   | 0,016850 |
| 73 (Pittet, 2008)        | 0,947      | 0,706       | 0,993       | 2,813   | 0,004904 |
| 74 (Pittet, 2008)        | 0,929      | 0,630       | 0,990       | 2,472   | 0,013449 |
| 75 (Tan, 2009)           | 0,400      | 0,158       | 0,703       | -0,628  | 0,529910 |
| 76 (Yan, 2010)           | 0,944      | 0,495       | 0,997       | 1,947   | 0,051542 |
| 78 (Iglesias, 2013)      | 0,962      | 0,597       | 0,998       | 2,232   | 0,025622 |
| 81 (Ceylan, 2014)        | 0,167      | 0,023       | 0,631       | -1,469  | 0,141776 |
| 82 (Ceylan, 2014)        | 0,833      | 0,369       | 0,977       | 1,469   | 0,141776 |
| 83 (Lalkovic, 2014)      | 0,955      | 0,552       | 0,997       | 2,103   | 0,035439 |
|                          | 0,744      | 0,621       | 0,837       | 3,661   | 0,000251 |

0.00 0.50 1.00
