# Supplementary figures and images for: Unconventional Perfusion Flaps in the Experimental Setting: A Systematic Review and Meta-Analysis
Source: PubMed Central journal article supplement — Plast Reconstr Surg. 2019 Apr 29;143(5):1003–16. doi: 10.1097/PRS.0000000000005560 (PMC6493691; doi:10.1097/prs.0000000000005560), 2019-04-29

Optimized  
experimental model  
(Study name)

# Flap survival rate; 95% CI

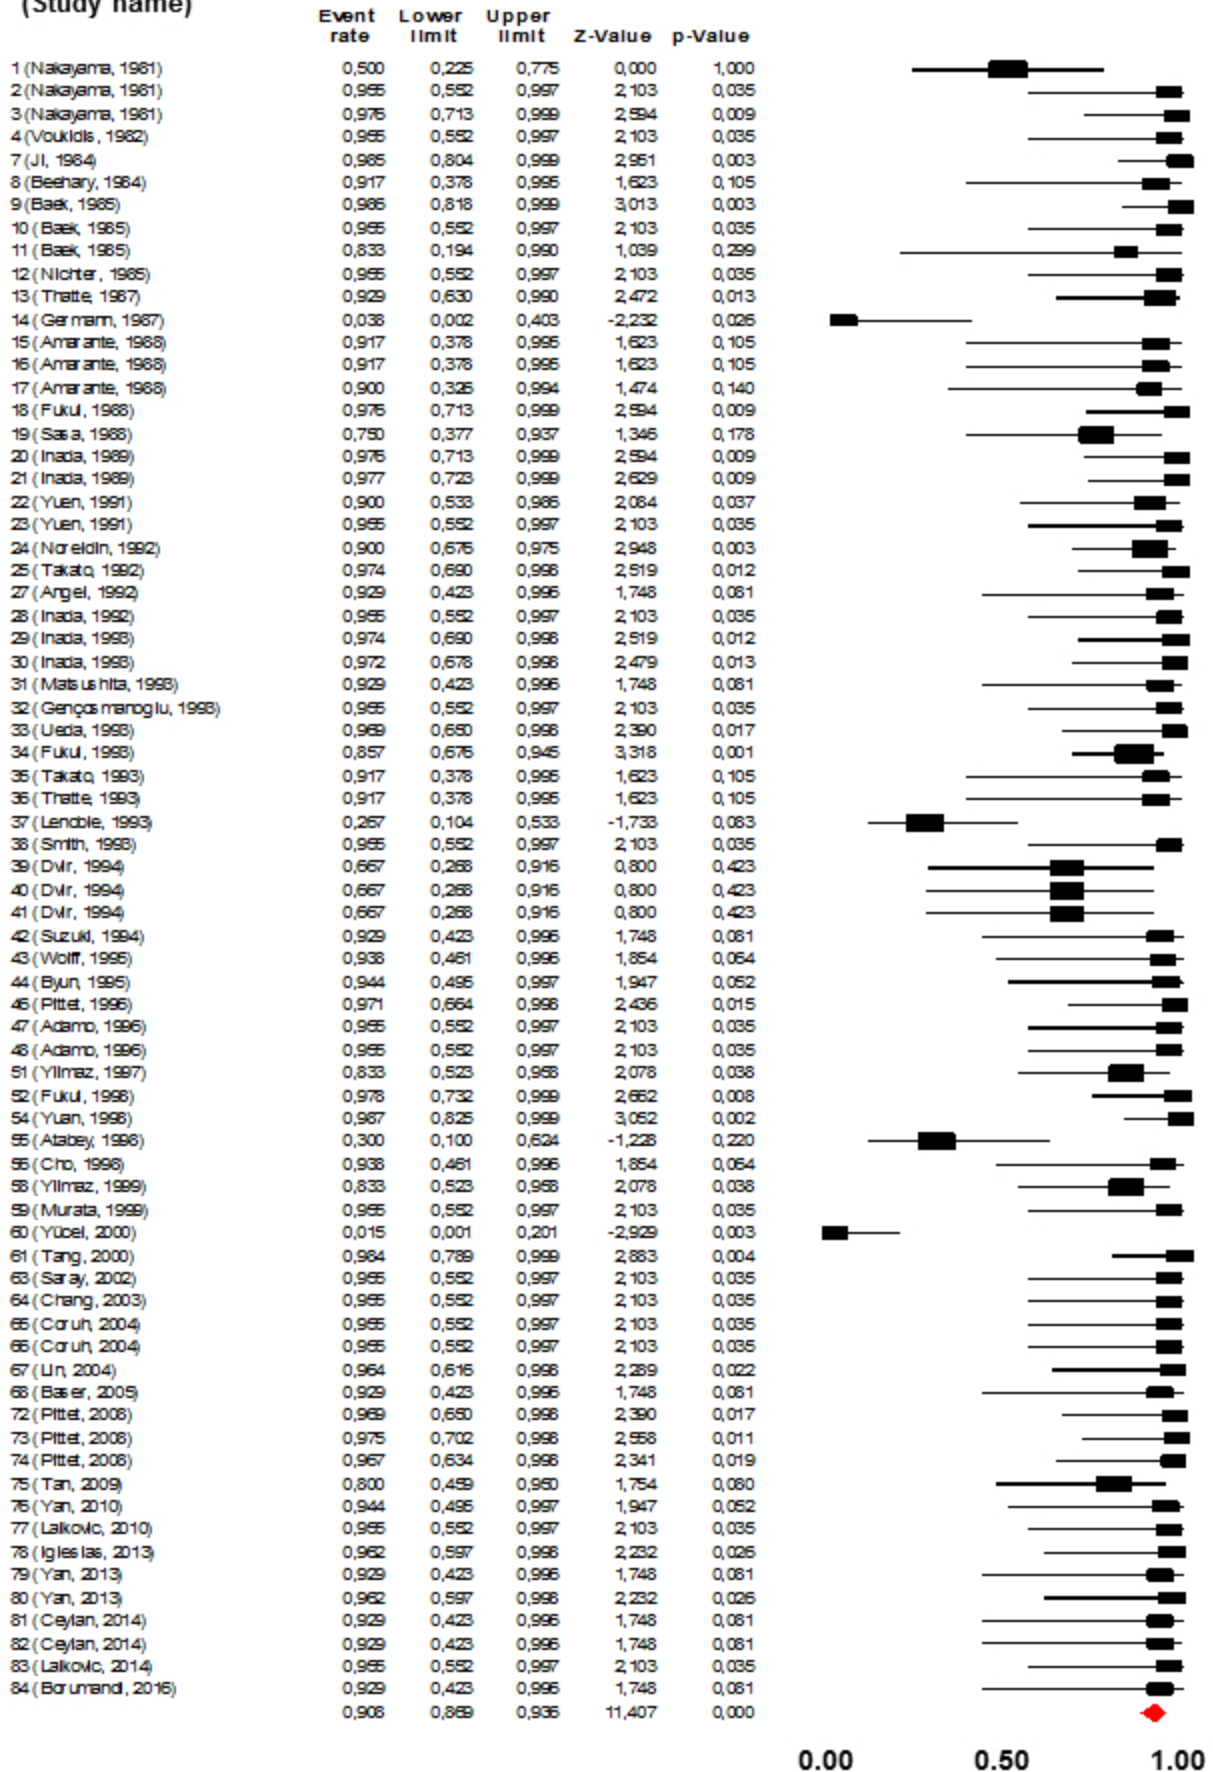

0.00 0.50 1.00

Supplement: prs-143-1003e-s003.pdf [file prs-143-1003e-s003.pdf]

# Unconventional perfusion flap models in different animal species

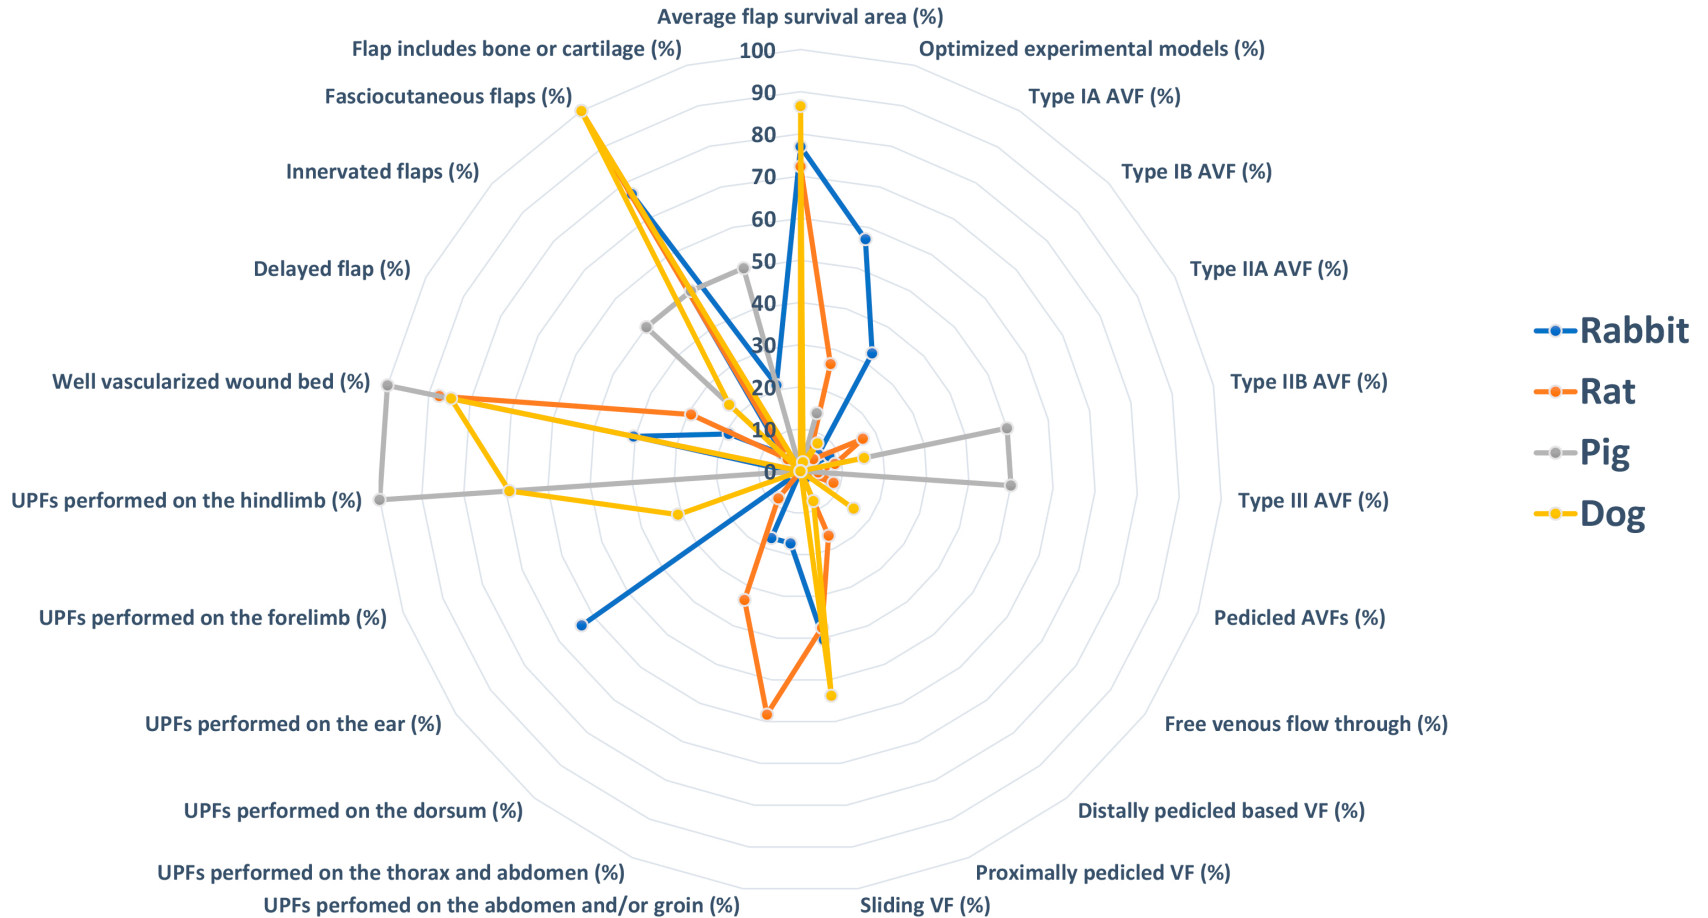

Supplement: prs-143-1003e-s004.pdf [file prs-143-1003e-s004.pdf]

### Funnel Plot of Standard Error by Logit event rate

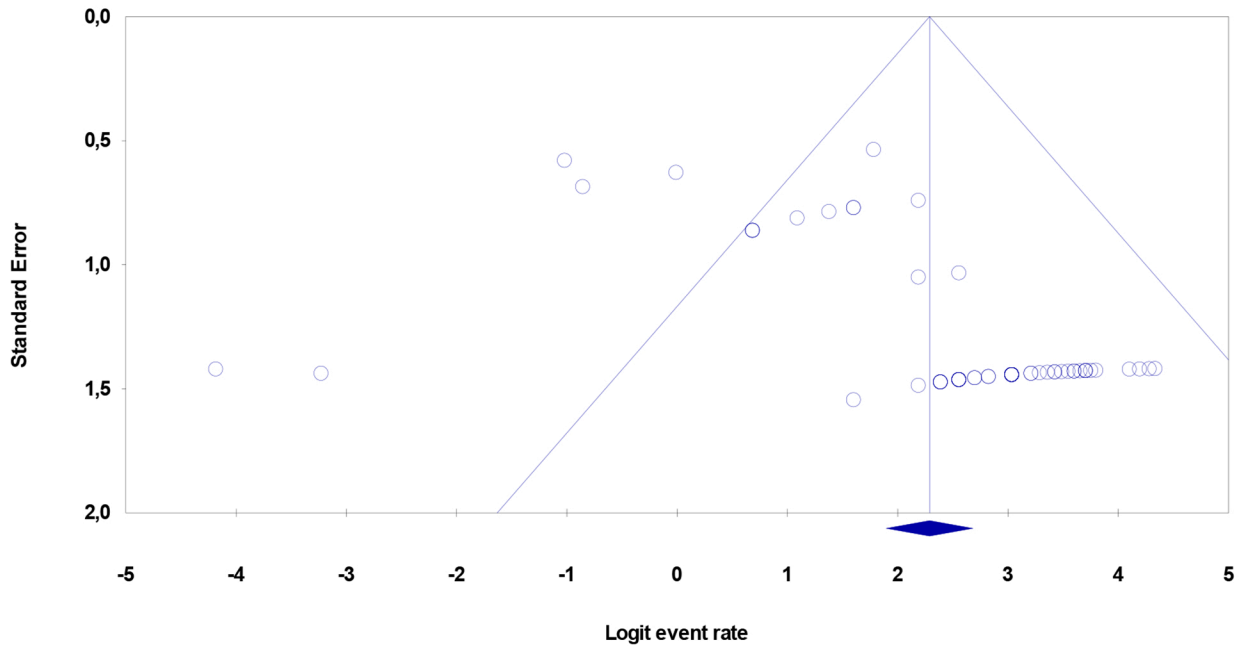

Supplement: prs-143-1003e-s005.pdf [file prs-143-1003e-s005.pdf]

### Funnel Plot of Standard Error by Logit event rate

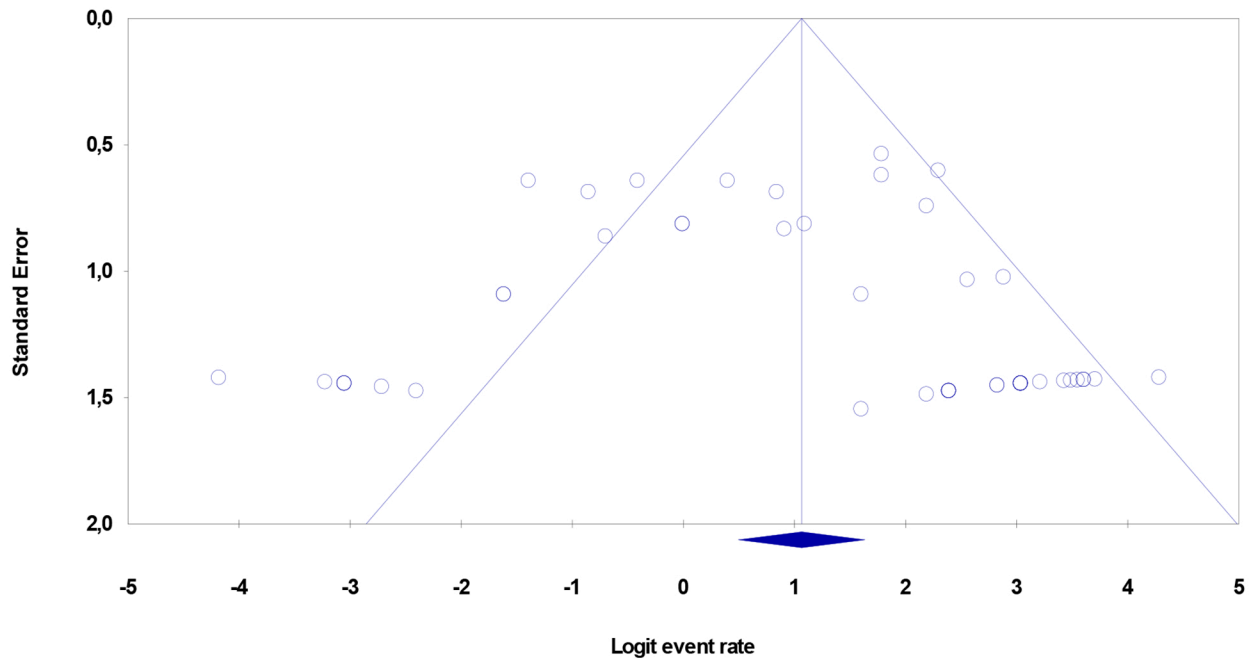

Supplement: prs-143-1003e-s007.pdf [file prs-143-1003e-s007.pdf]

# Survival rates of experimental unconventional perfusion flaps

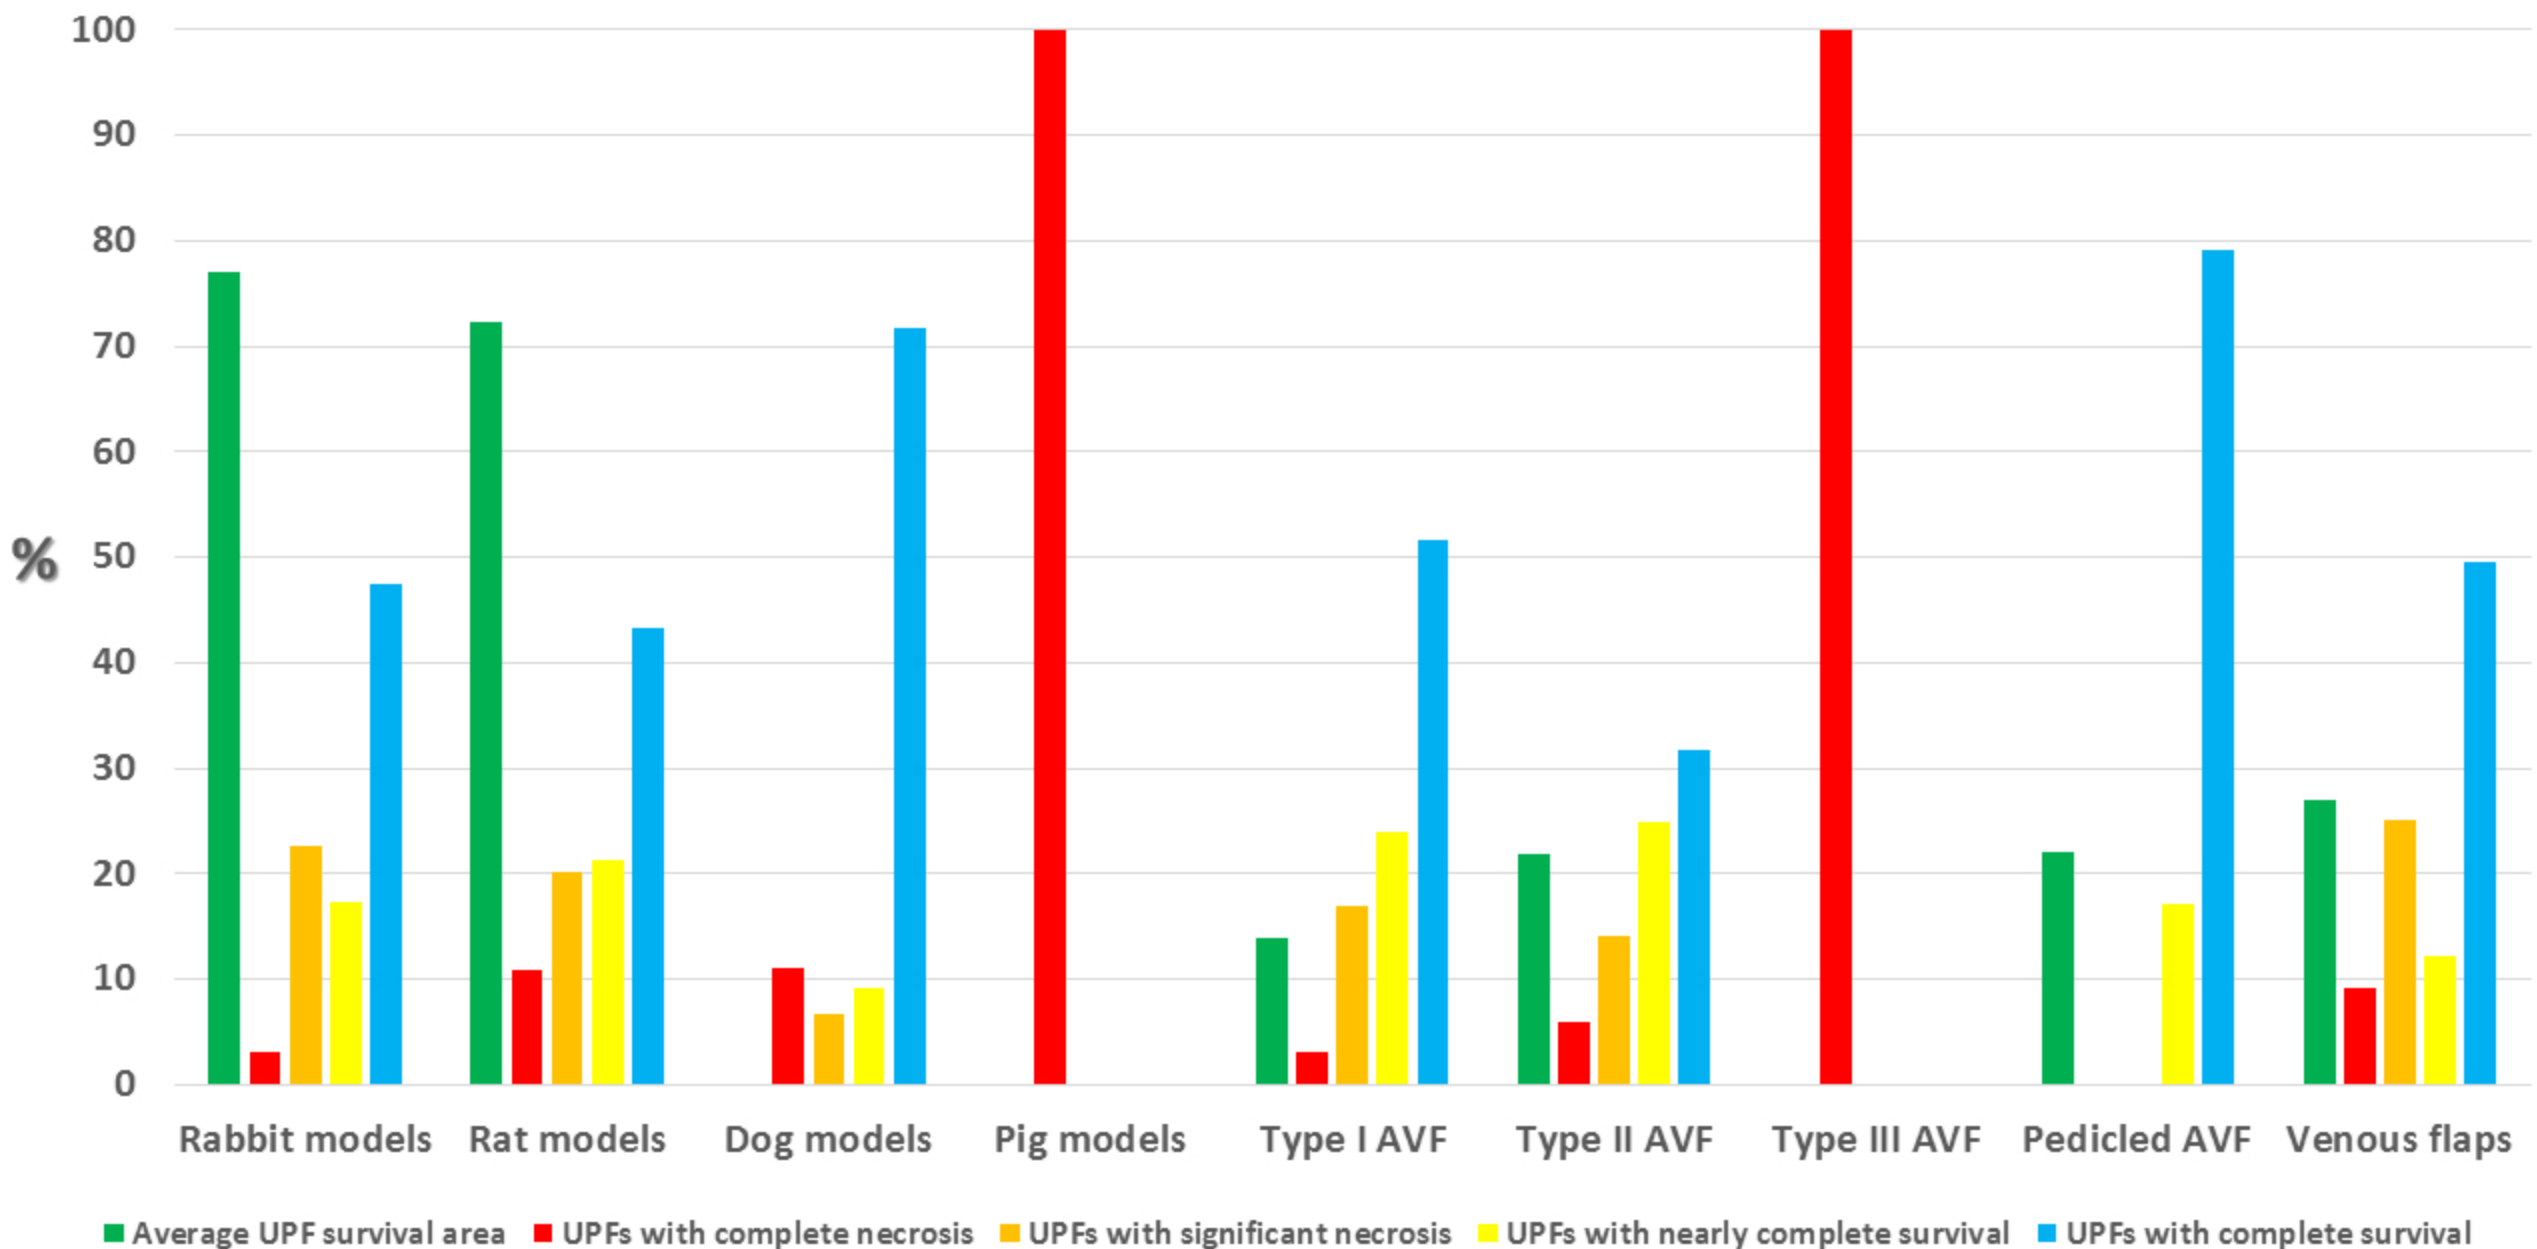

Supplement: prs-143-1003e-s008.pdf [file prs-143-1003e-s008.pdf]
